# Supplementary material for: Deposition of Stainless Steel Thin Films: An Electron Beam Physical Vapour Deposition Approach
Source: PubMed Central journal article supplement (PMC6416557; doi:10.3390/ma12040571), 2019-02-14
Supplement: materials-12-00571-s001.pdf [file materials-12-00571-s001.pdf]

# Supplementary materials: Deposition of Stainless Steel Thin Films: An Electron Beam Physical Vapour Deposition Approach

Naser Ali, Joao A. Teixeira, Abdulmajid Addali, Maryam Saeed, Feras Al-Zubi, Ahmad Sedaghat and Husain Bahzad

SEM images of the Stainless steel evaporant source and deposited thin films:

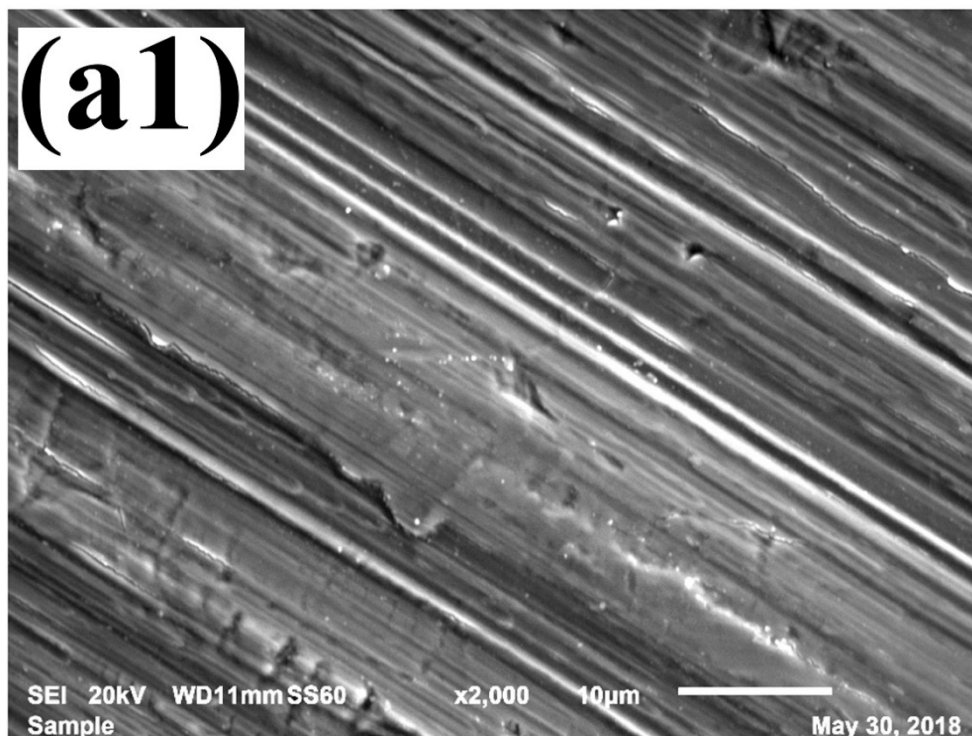

Figure S1. (a1) SEM image of the 0.05 Å/s deposited film.

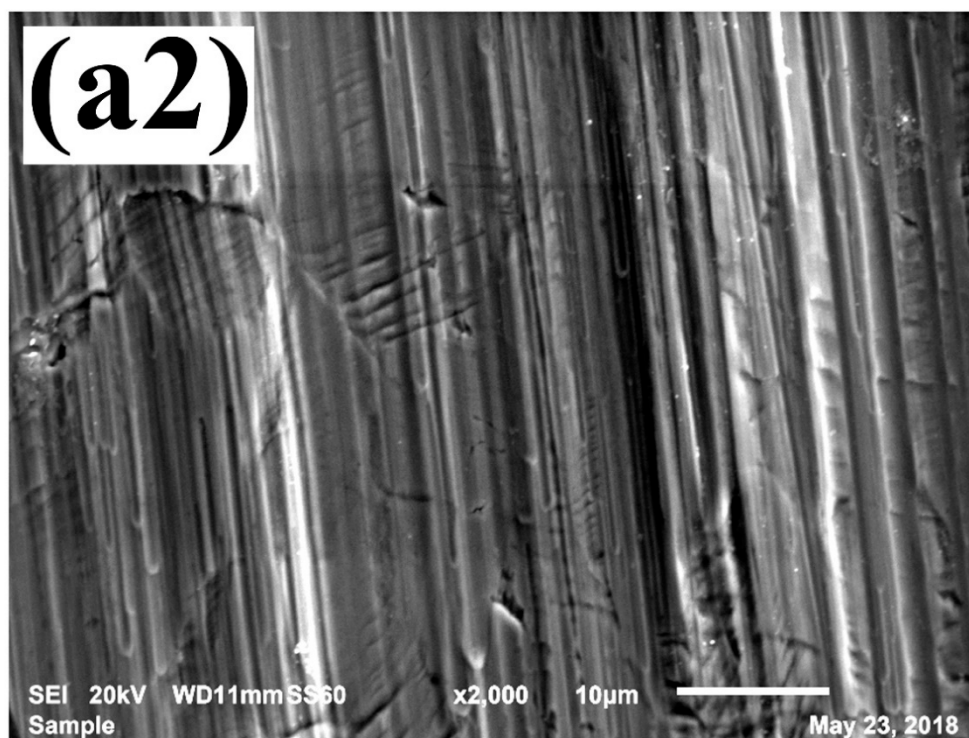

Figure S1. (a2) SEM image of the 0.16 Å/s deposited film.

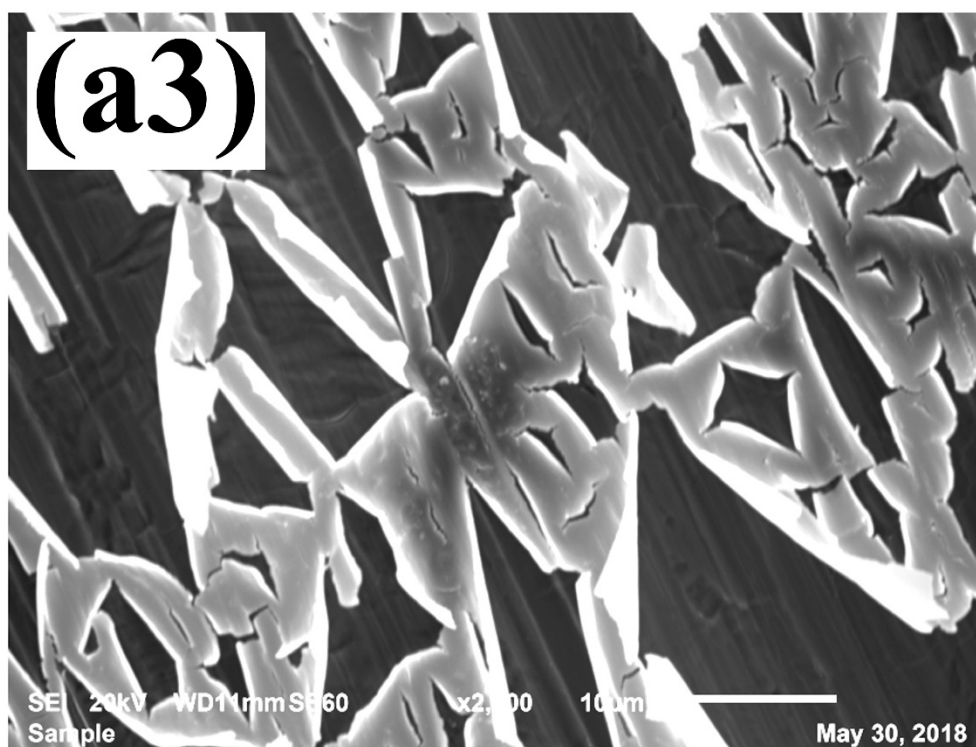

Figure S1. (a3) SEM image of the 0.82 Å/s deposited film.

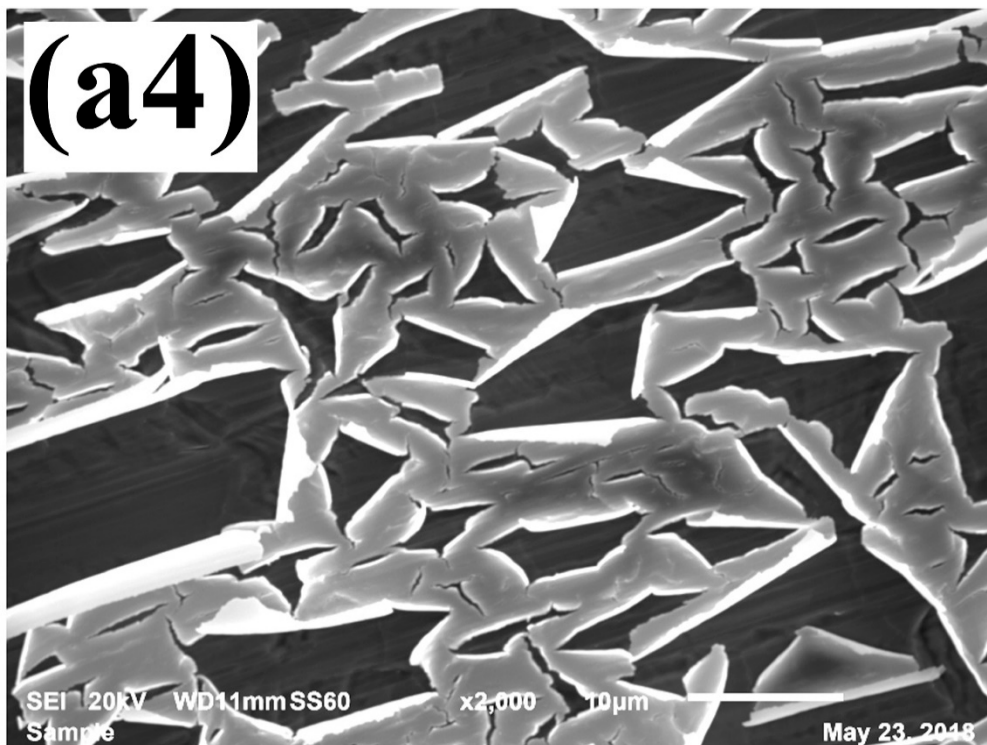

Figure S1. (a4) SEM image of the 1.07 Å/s deposited film.

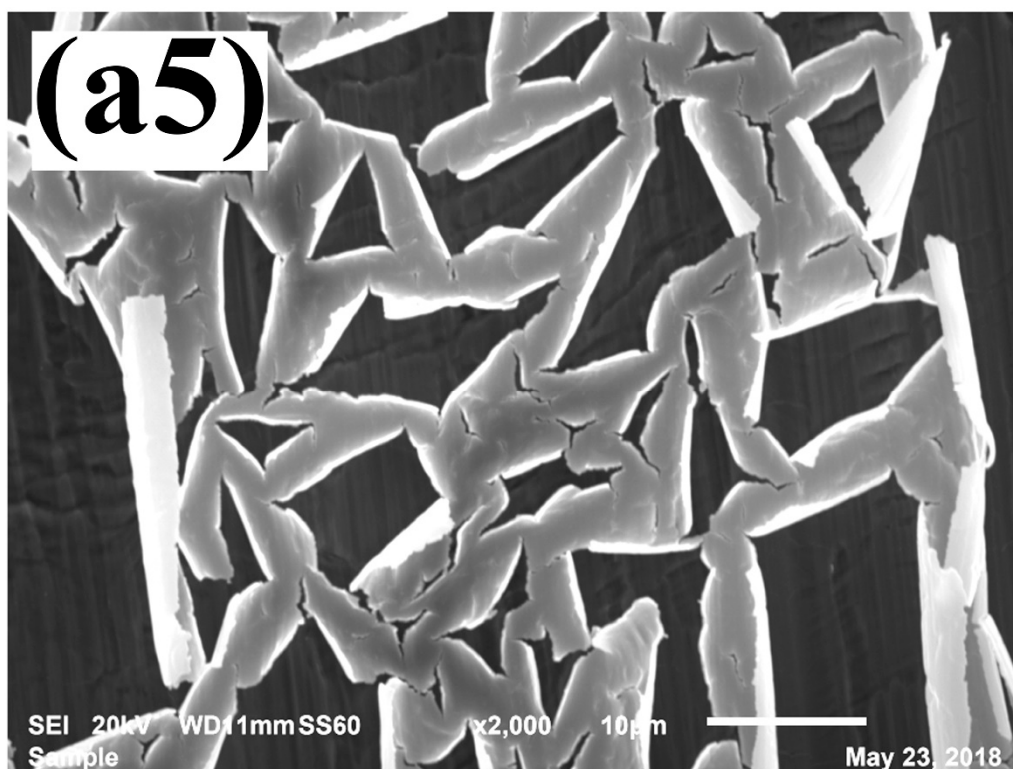

Figure S1. (a5) SEM image of the 1.45 Å/s deposited film.



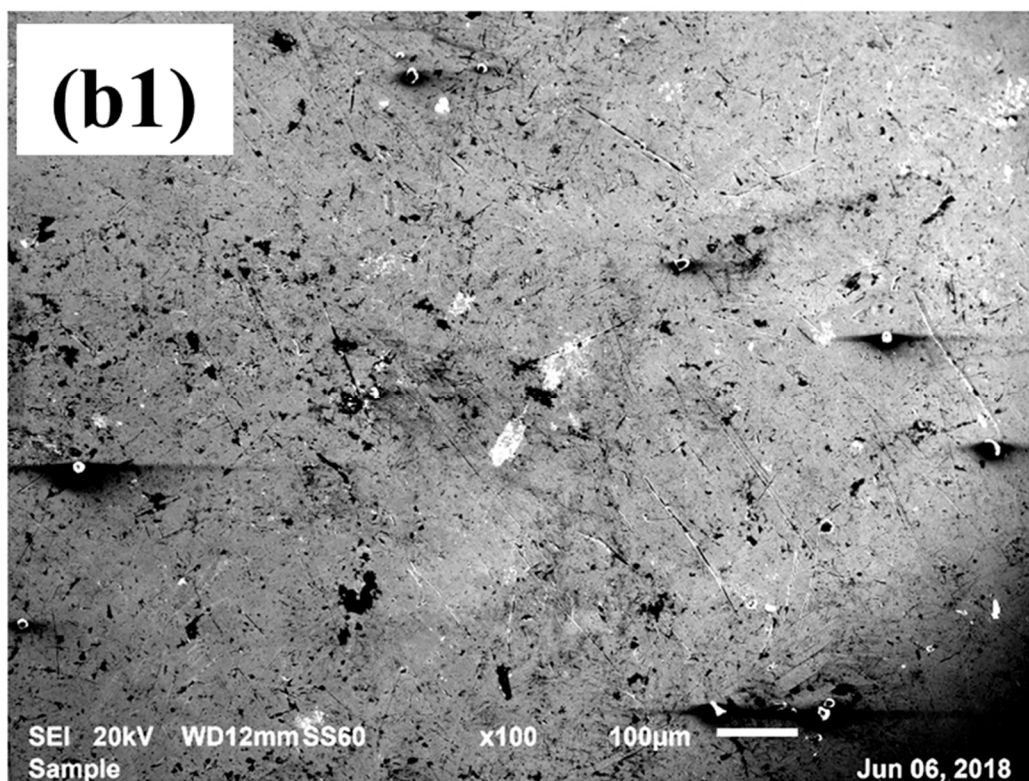

Figure S1. (b1) SEM image of the as-received evaporant source before film deposition.

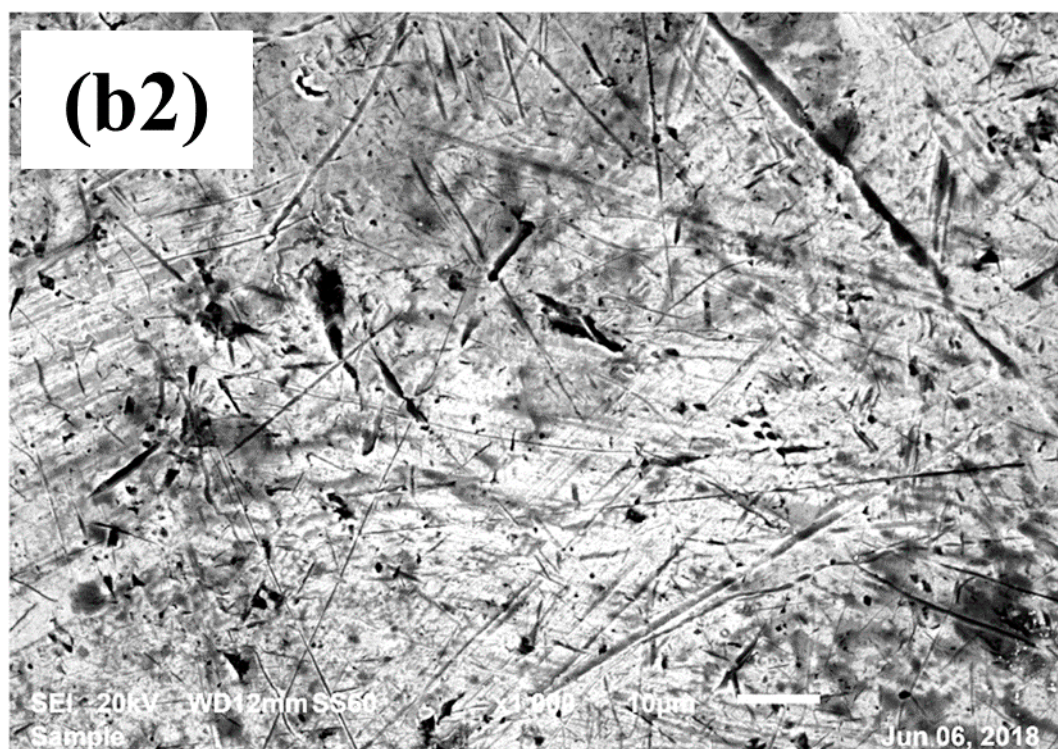

Figure S1. (b2) Higher resolution SEM image of the as-received evaporant source before film deposition.



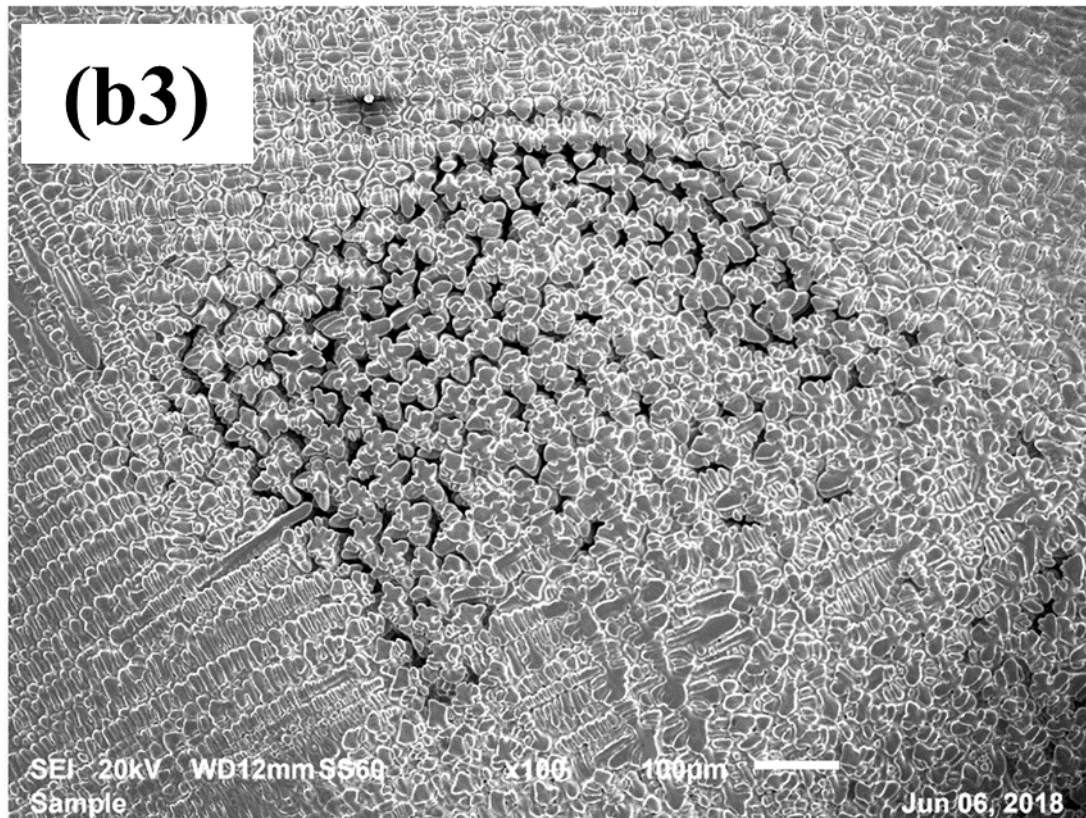

Figure S1. (b3) SEM image of the as-received evaporant source after 0.05 Å/s film deposition.

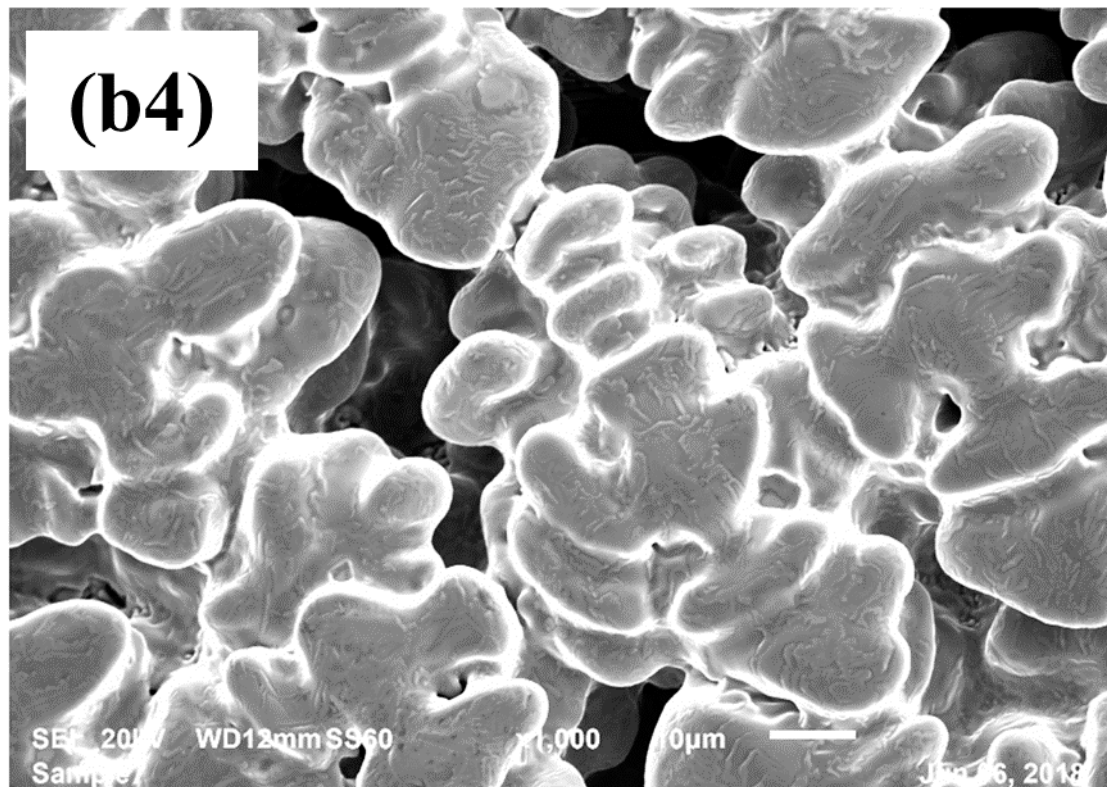

Figure S1. (b4) Higher resolution SEM image of the as-received evaporant source after 0.05 Å/s film deposition.



Deposited film EDS elemental analysis:

(a)

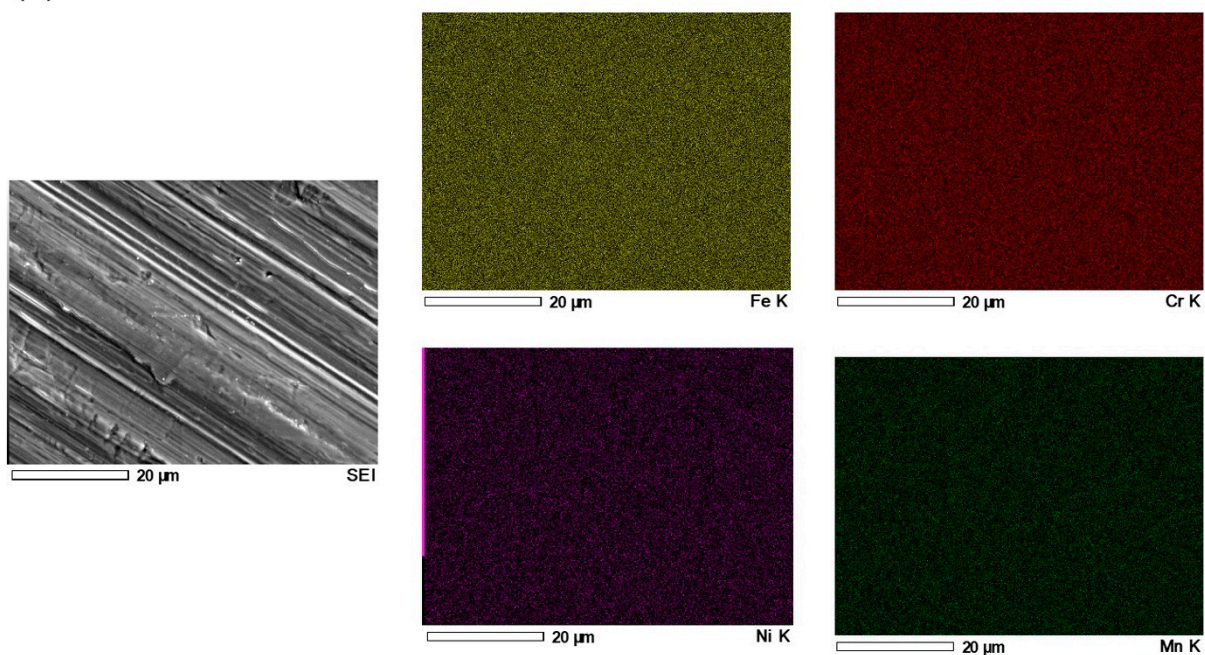

Figure S2. (a) SEM image and its elemental maps of the characterized 150 nm deposited SS film at 0.05 Å/s on Cu substrate.

(b)

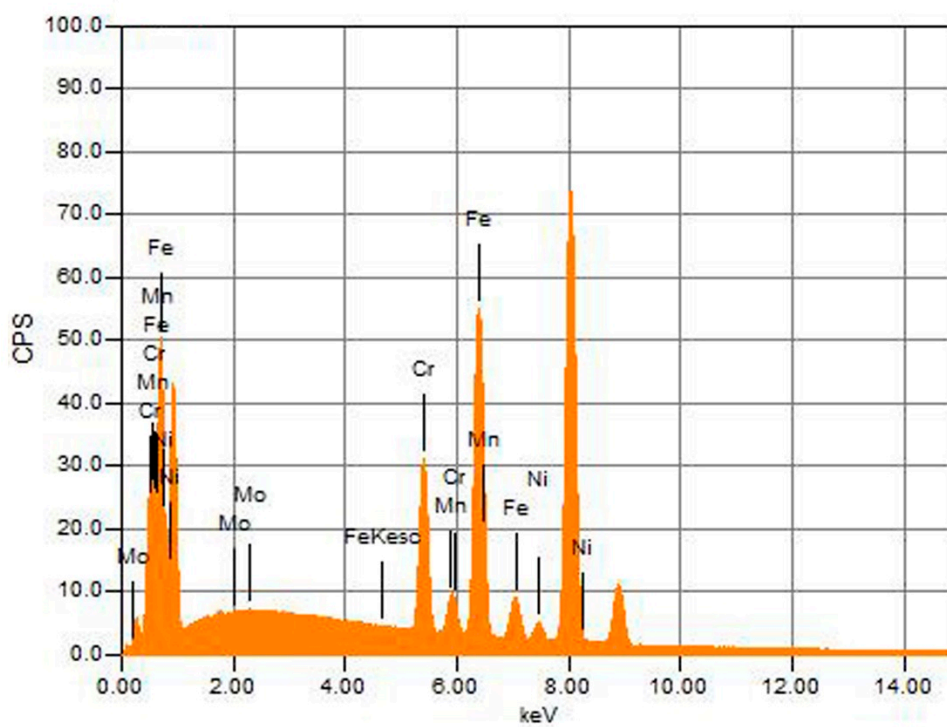

Figure S2. (b) EDS x-ray spectrum of the elements.

Surface topography analysis of SS films on SS 316L substrates:

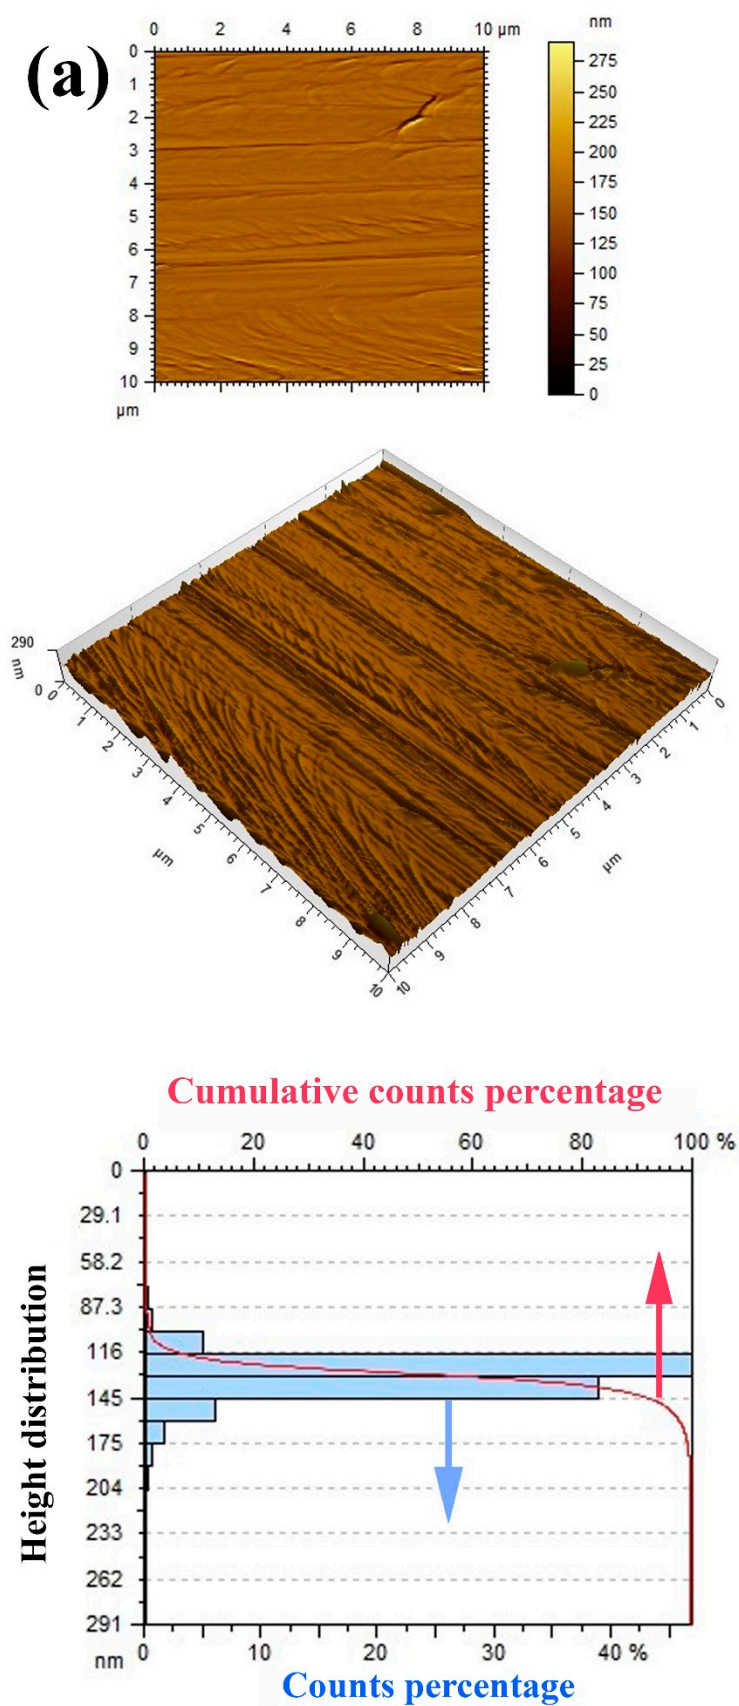

Figure S3. (a) AFM images and analysis of the uncoated substrate.



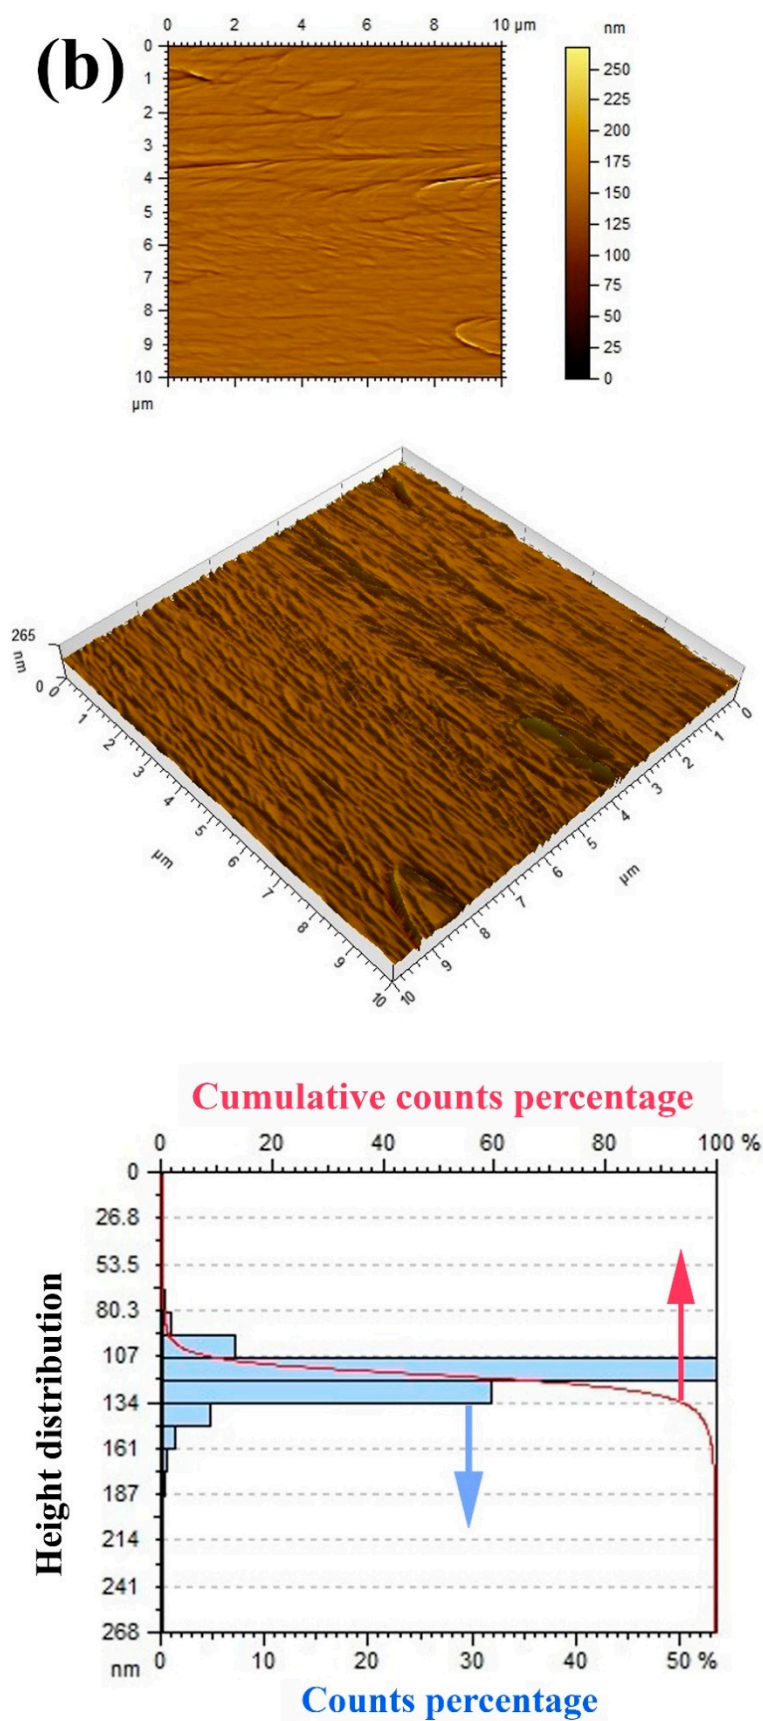

Figure S3. (b) AFM images and analysis of the 50 nm coated substrate.

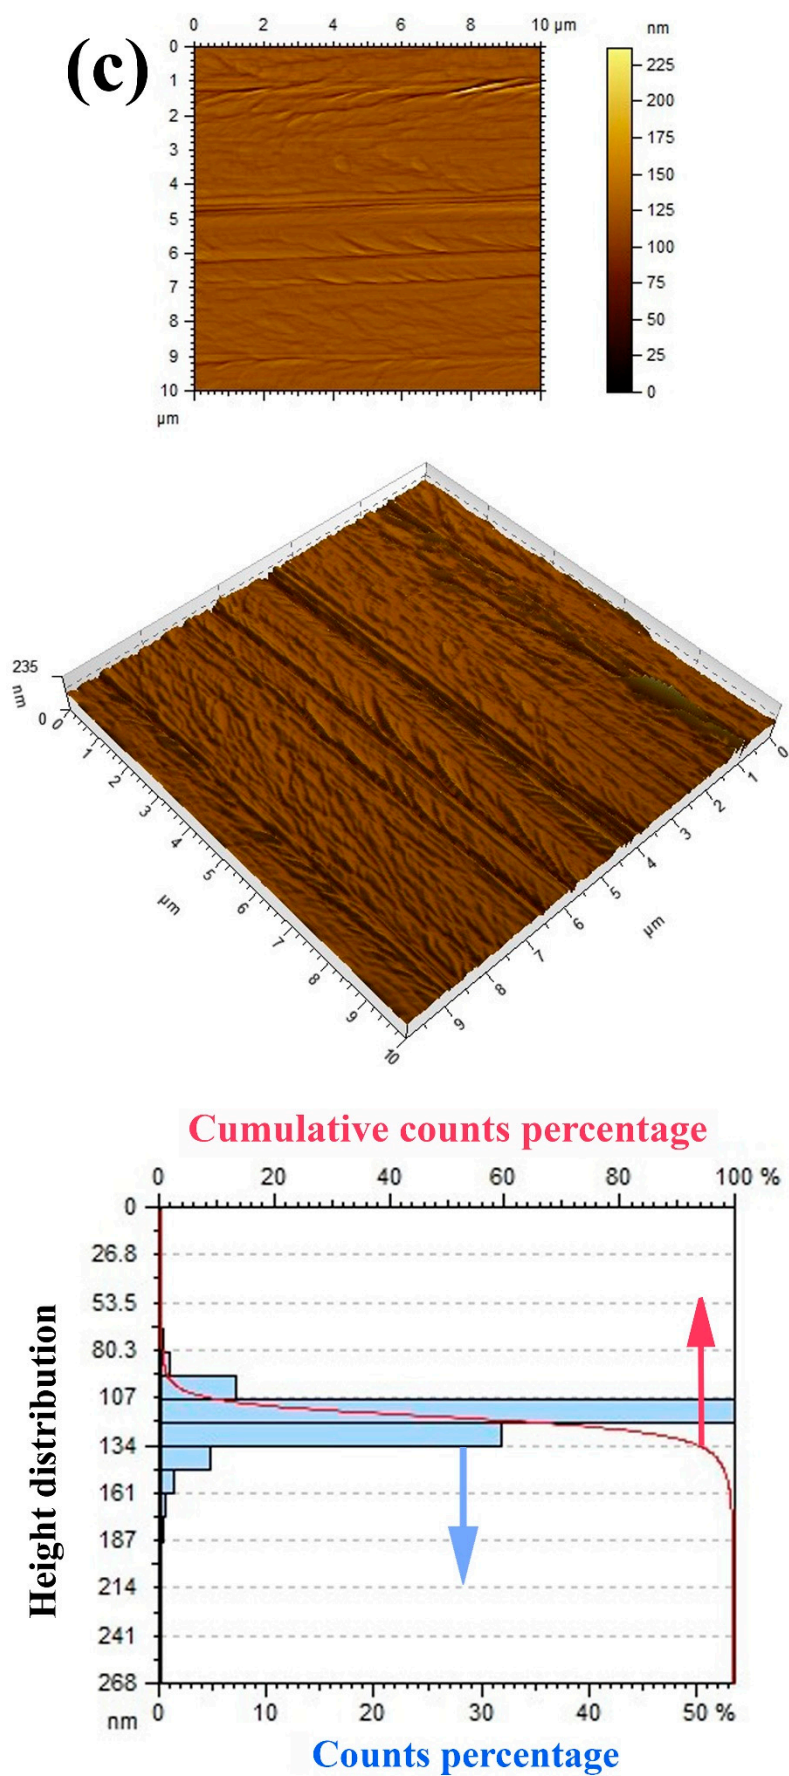

Figure S3. (c) AFM images and analysis of the 100 nm coated substrate.

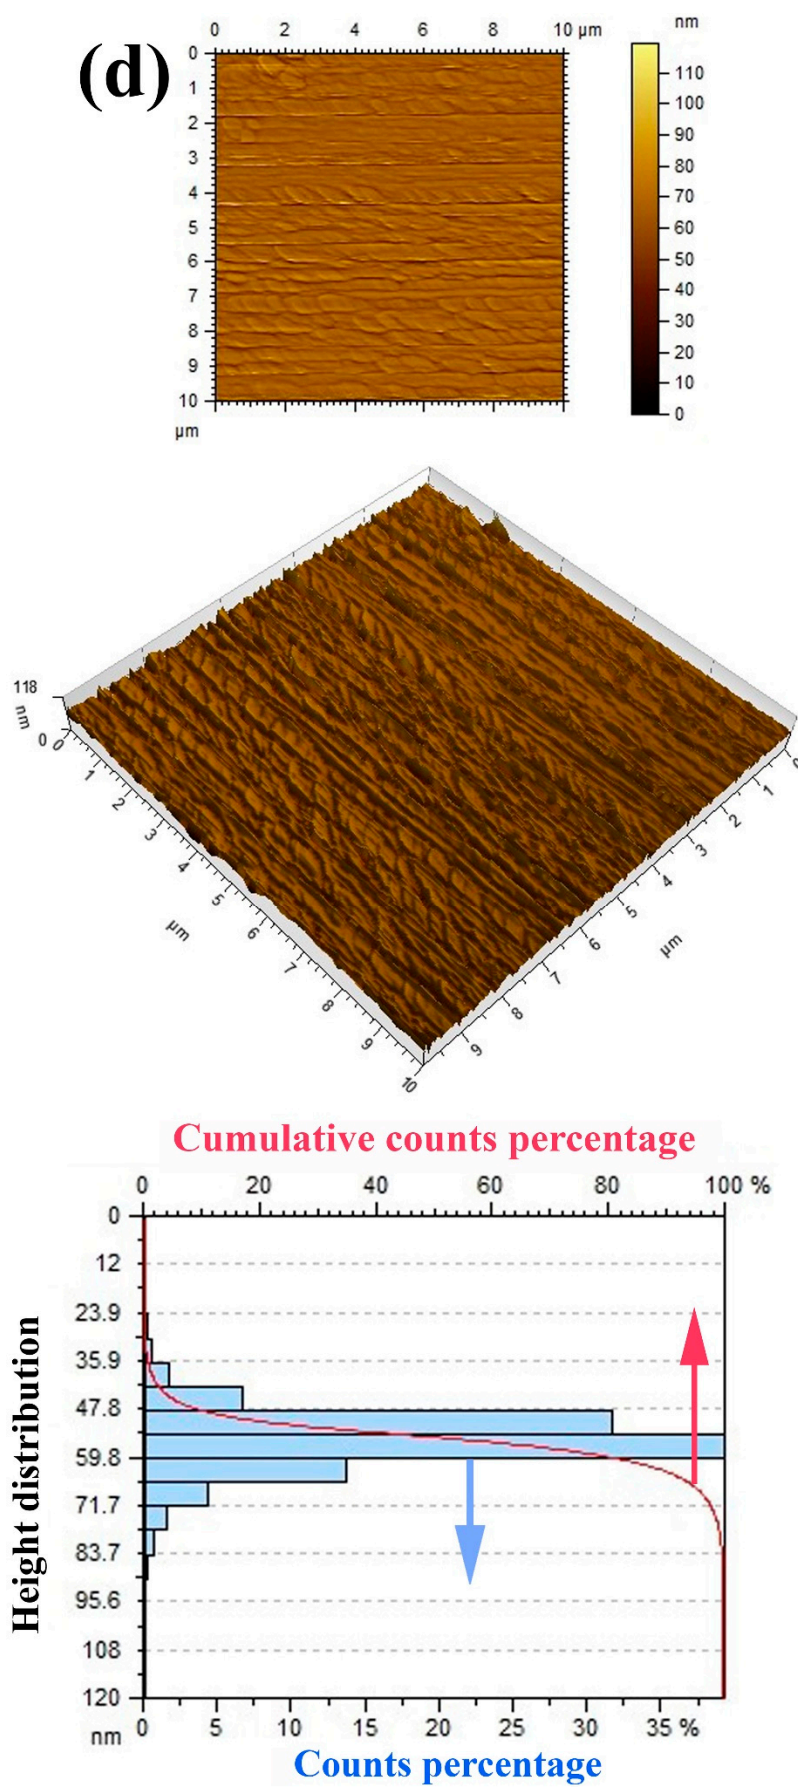

Figure S3. (d) AFM images and analysis of the 150 nm coated substrate.



Table S1. Contact angle measurements data.

| DIW temperature (°C) | DIW pH value | Stainless steel substrate surface information | Highest CA (degree) | Lowest CA (degree) | ACA (degree) |
|----------------------|--------------|-----------------------------------------------|---------------------|--------------------|--------------|
| 20                   | 4            | Uncoated                                      | 126.5               | 122.5              | 124.9        |
| 30                   | 4            | Uncoated                                      | 120.6               | 119.4              | 119.8        |
| 40                   | 4            | Uncoated                                      | 106.5               | 106.2              | 106.3        |
| 50                   | 4            | Uncoated                                      | 110.3               | 110.1              | 110.2        |
| 60                   | 4            | Uncoated                                      | 112.7               | 112.1              | 112.3        |
| 20                   | 7            | Uncoated                                      | 132.8               | 130.9              | 131.7        |
| 30                   | 7            | Uncoated                                      | 122.5               | 119.5              | 120.6        |
| 40                   | 7            | Uncoated                                      | 115.8               | 115.6              | 115.7        |
| 50                   | 7            | Uncoated                                      | 115.2               | 114.5              | 114.8        |
| 60                   | 7            | Uncoated                                      | 115.3               | 114.8              | 115.1        |
| 20                   | 9            | Uncoated                                      | 117.8               | 116.7              | 117.4        |
| 30                   | 9            | Uncoated                                      | 115.7               | 114.8              | 115.3        |
| 40                   | 9            | Uncoated                                      | 108.3               | 108.0              | 108.1        |
| 50                   | 9            | Uncoated                                      | 112.7               | 112.1              | 112.3        |
| 60                   | 9            | Uncoated                                      | 107.4               | 106.8              | 107.1        |
| 20                   | 4            | 50 nm SS film                                 | 121.0               | 117.8              | 119.5        |
| 30                   | 4            | 50 nm SS film                                 | 110.8               | 110.4              | 110.6        |
| 40                   | 4            | 50 nm SS film                                 | 104.2               | 103.8              | 104.0        |
| 50                   | 4            | 50 nm SS film                                 | 110.1               | 108.7              | 109.3        |
| 60                   | 4            | 50 nm SS film                                 | 110.7               | 110.2              | 110.4        |
| 20                   | 7            | 50 nm SS film                                 | 131.3               | 130.1              | 130.9        |
| 30                   | 7            | 50 nm SS film                                 | 116.7               | 114.8              | 115.8        |
| 40                   | 7            | 50 nm SS film                                 | 105.1               | 104.9              | 105.0        |
| 50                   | 7            | 50 nm SS film                                 | 104.6               | 104.1              | 104.4        |
| 60                   | 7            | 50 nm SS film                                 | 101.3               | 100.8              | 101.1        |
| 20                   | 9            | 50 nm SS film                                 | 109.6               | 108.7              | 109.2        |
| 30                   | 9            | 50 nm SS film                                 | 106.6               | 106.4              | 106.5        |
| 40                   | 9            | 50 nm SS film                                 | 108.7               | 107.4              | 108.1        |
| 50                   | 9            | 50 nm SS film                                 | 100.6               | 99.0               | 99.7         |
| 60                   | 9            | 50 nm SS film                                 | 105.0               | 104.9              | 104.9        |
| 20                   | 4            | 100 nm SS film                                | 117.4               | 115.8              | 116.7        |
| 30                   | 4            | 100 nm SS film                                | 104.0               | 103.5              | 103.8        |
| 40                   | 4            | 100 nm SS film                                | 103.8               | 103.3              | 103.5        |
| 50                   | 4            | 100 nm SS film                                | 99.0                | 98.1               | 98.5         |
| 60                   | 4            | 100 nm SS film                                | 102.1               | 101.3              | 101.7        |
| 20                   | 7            | 100 nm SS film                                | 128.3               | 128.1              | 128.2        |
| 30                   | 7            | 100 nm SS film                                | 109.6               | 108.8              | 109.3        |
| 40                   | 7            | 100 nm SS film                                | 103.4               | 102.8              | 103.0        |
| 50                   | 7            | 100 nm SS film                                | 103.3               | 102.7              | 102.9        |
| 60                   | 7            | 100 nm SS film                                | 100.6               | 99.0               | 99.9         |
| 20                   | 9            | 100 nm SS film                                | 103.3               | 103.0              | 103.2        |
| 30                   | 9            | 100 nm SS film                                | 103.4               | 103.2              | 103.3        |
| 40                   | 9            | 100 nm SS film                                | 106.2               | 105.1              | 105.7        |
| 50                   | 9            | 100 nm SS film                                | 99.7                | 98.1               | 98.8         |
| 60                   | 9            | 100 nm SS film                                | 98.4                | 97.5               | 98.1         |
| 20                   | 4            | 150 nm SS film                                | 111.0               | 110.6              | 110.9        |
| 30                   | 4            | 150 nm SS film                                | 99.8                | 98.1               | 99.0         |
| 40                   | 4            | 150 nm SS film                                | 102.8               | 102.0              | 102.5        |
| 50                   | 4            | 150 nm SS film                                | 94.4                | 92.1               | 93.1         |
| 60                   | 4            | 150 nm SS film                                | 88.7                | 88.4               | 88.5         |
| 20                   | 7            | 150 nm SS film                                | 122.6               | 121.0              | 122.0        |
| 30                   | 7            | 150 nm SS film                                | 106.7               | 106.4              | 106.6        |
| 40                   | 7            | 150 nm SS film                                | 102.9               | 102.5              | 102.7        |
| 50                   | 7            | 150 nm SS film                                | 95.8                | 95.1               | 95.5         |

|    |   |                |       |       |       |
|----|---|----------------|-------|-------|-------|
| 60 | 7 | 150 nm SS film | 95.5  | 94.7  | 95.2  |
| 20 | 9 | 150 nm SS film | 95.0  | 94.2  | 94.5  |
| 30 | 9 | 150 nm SS film | 101.3 | 100.9 | 101.0 |
| 40 | 9 | 150 nm SS film | 103.4 | 102.9 | 103.2 |
| 50 | 9 | 150 nm SS film | 97.5  | 96.2  | 97.0  |
| 60 | 9 | 150 nm SS film | 97.4  | 96.7  | 97.0  |

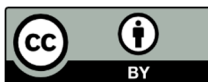

© 2019 by the authors. Submitted for possible open access publication under the terms and conditions of the Creative Commons Attribution (CC BY) license (<http://creativecommons.org/licenses/by/4.0/>).
